# Supplementary material for: Aberrant One-Carbon Metabolism and Ancestral Genetics Underlie Edematous Severe Acute Malnutrition
Source: Research Square preprint supplement (doi:10.21203/rs.3.rs-6890799/v1), 2025-06-29
Supplement: Supplementary file 1 [file b25c589c37720bf06bd585ca.pdf]

## **Supplementary Figures**

### **Aberrant One-Carbon Metabolism and Ancestral Genetics Underlie Edematous Severe Acute Malnutrition**

**(Lie et. al.)**

**Supplementary Figure S1** – Data analysis flowchart

**Supplementary Figure S2** – 2D plots of Multidimensional scaling (MDS) components 1-3

**Supplementary Figure S3** – Scree plots of Proportion of Variance attributable

**Supplementary Figure S4** – LocusZoom plots of top OCM loci

**Supplementary Figure S5** – Minor allele frequencies and effect sizes in Jamaica and  
Malawi

**Supplementary Figure S6** – Haploview and linkage disequilibrium (LD) plots for  
associated SNPs at *GABBR2* in Jamaica and Malawi

**Supplementary Figure S7** – Admixture plots for African populations

**Supplementary Figure S8** – Violin plots of individual ancestry proportions

**Supplementary Figure S9** - Proportion of SNPs at OCM loci with absolute Standardized  
iHS score > 2

**Supplementary Figure S10** – Density plots of Standardized iHS scores by SAM category

**A**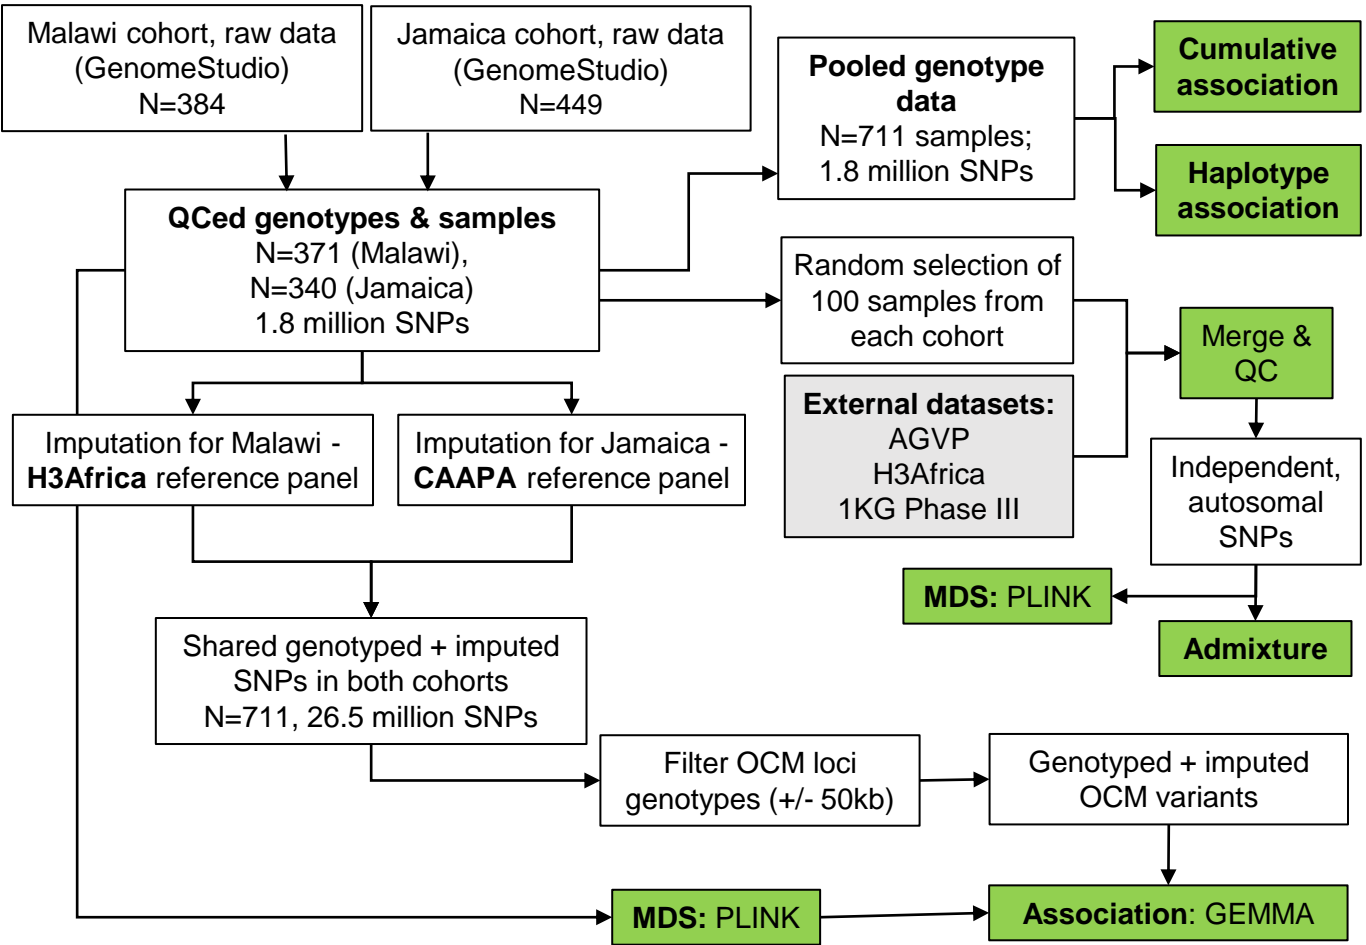**B**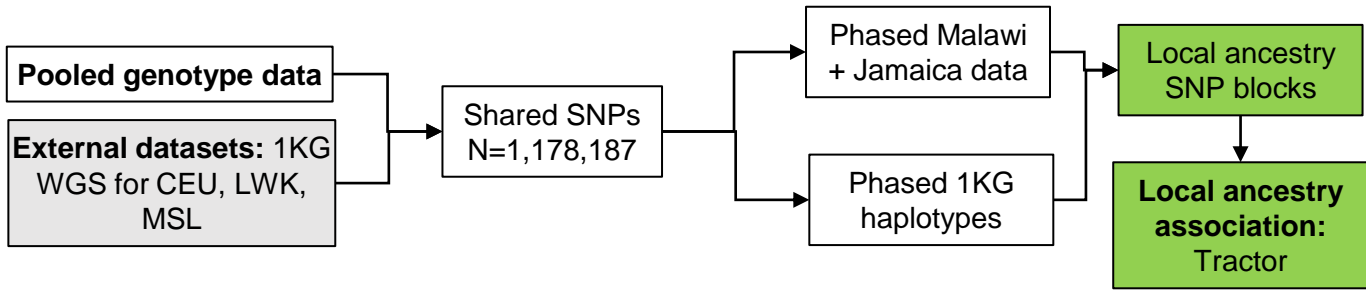

**Figure S1 – Flowchart of SAM-OCM analyses. S1A** – Data processing and analysis steps for genetic association tests and admixture analysis. **S1B** – Data processing and analysis steps for ancestry-adjusted association analysis. Boxes labelled as “Pooled genotype data” in S1A and S1B refer to the same set of genetic data. 1KG – 1000 Genomes Project populations; MDS – Multidimensional Scaling; QC – Quality control.

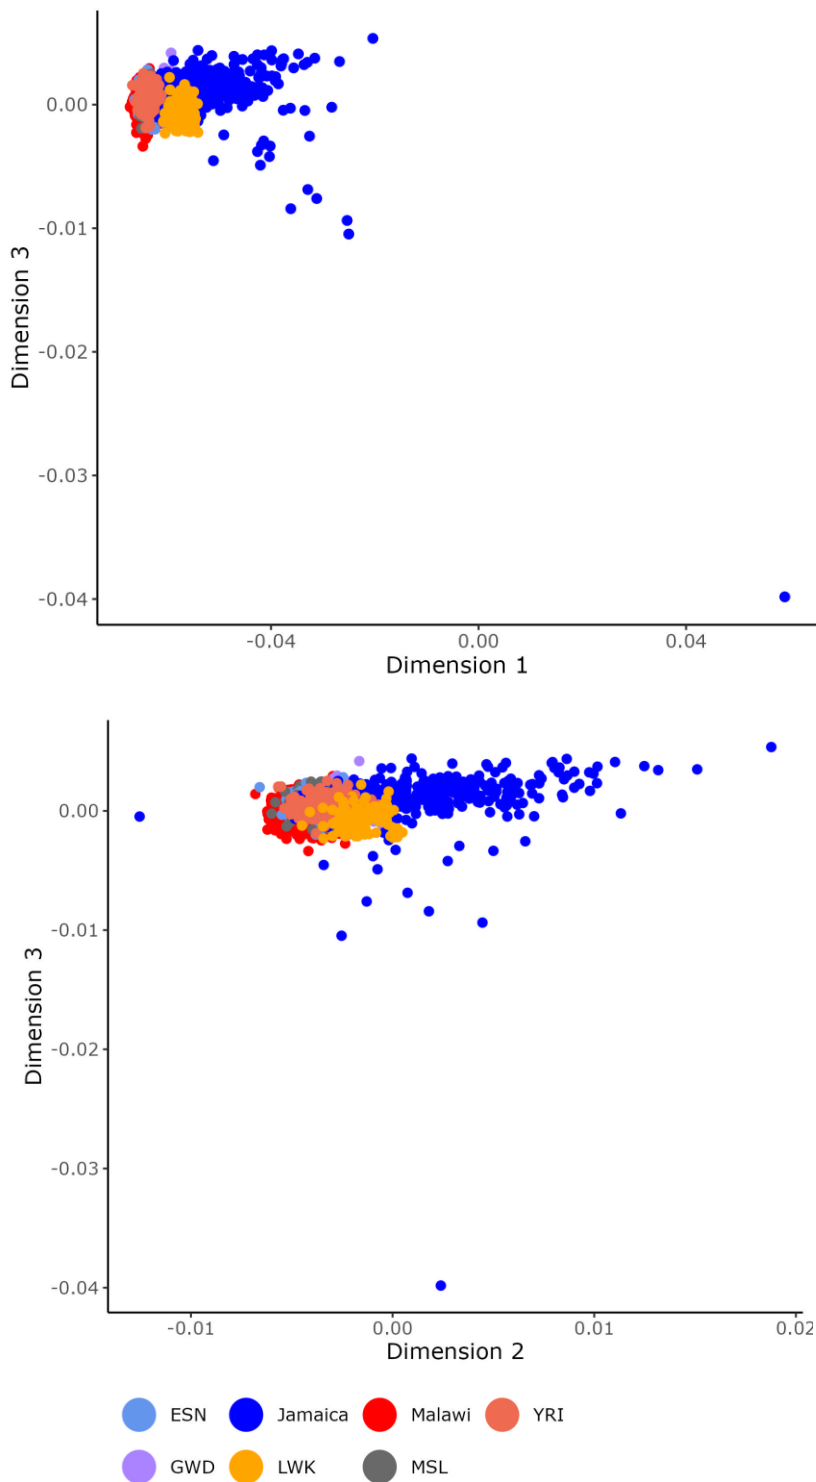

**Figure S2 – 2D plots of Multidimensional scaling (MDS) Dimensions 1 to 3.** Population abbreviations are per the 1000 Genomes Project: ESN – Esan in Nigeria; GWD – Gambians from Western Division; LWK – Luyha in Webuye, Kenya; MSL - Mende in Sierra Leone; YRI – Yoruba in Ibadan, Nigeria

### All Samples

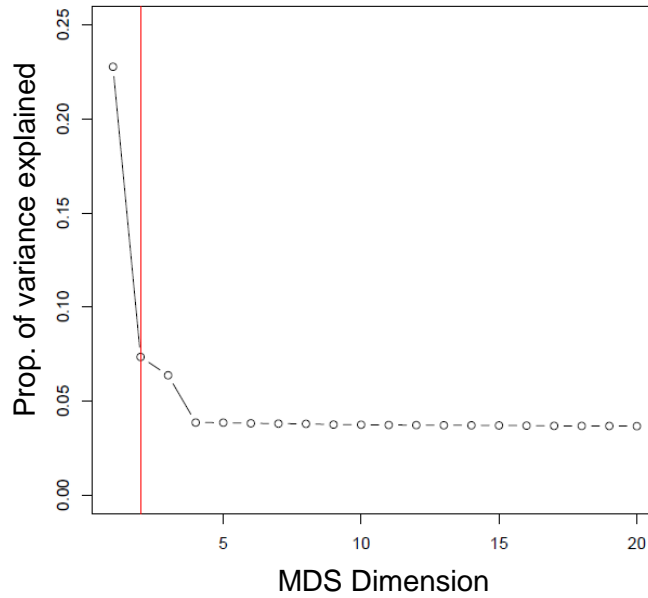

### Jamaica samples

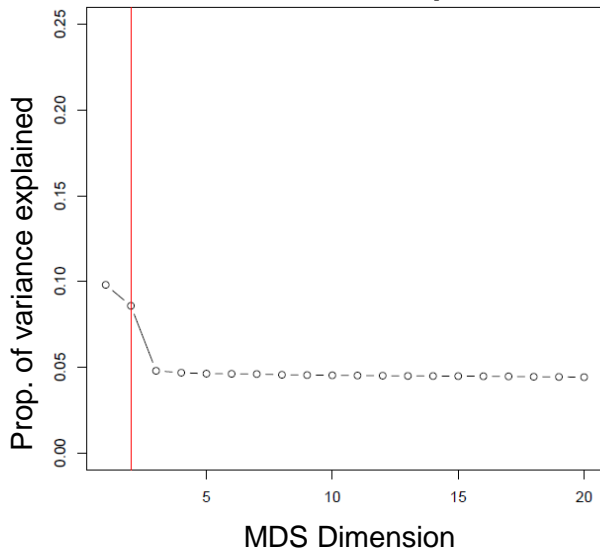

### Malawi samples

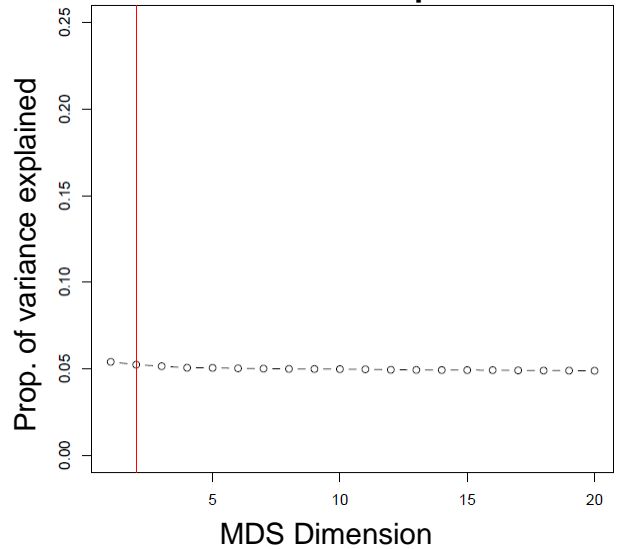

**Figure S3 – Multidimensional Scaling (MDS) variance scree plots** - MDS eigenvalues are calculated based on first 20 MDS dimensions and scree plots were generated for three cohorts – All samples, Jamaica samples alone and Malawi samples alone.

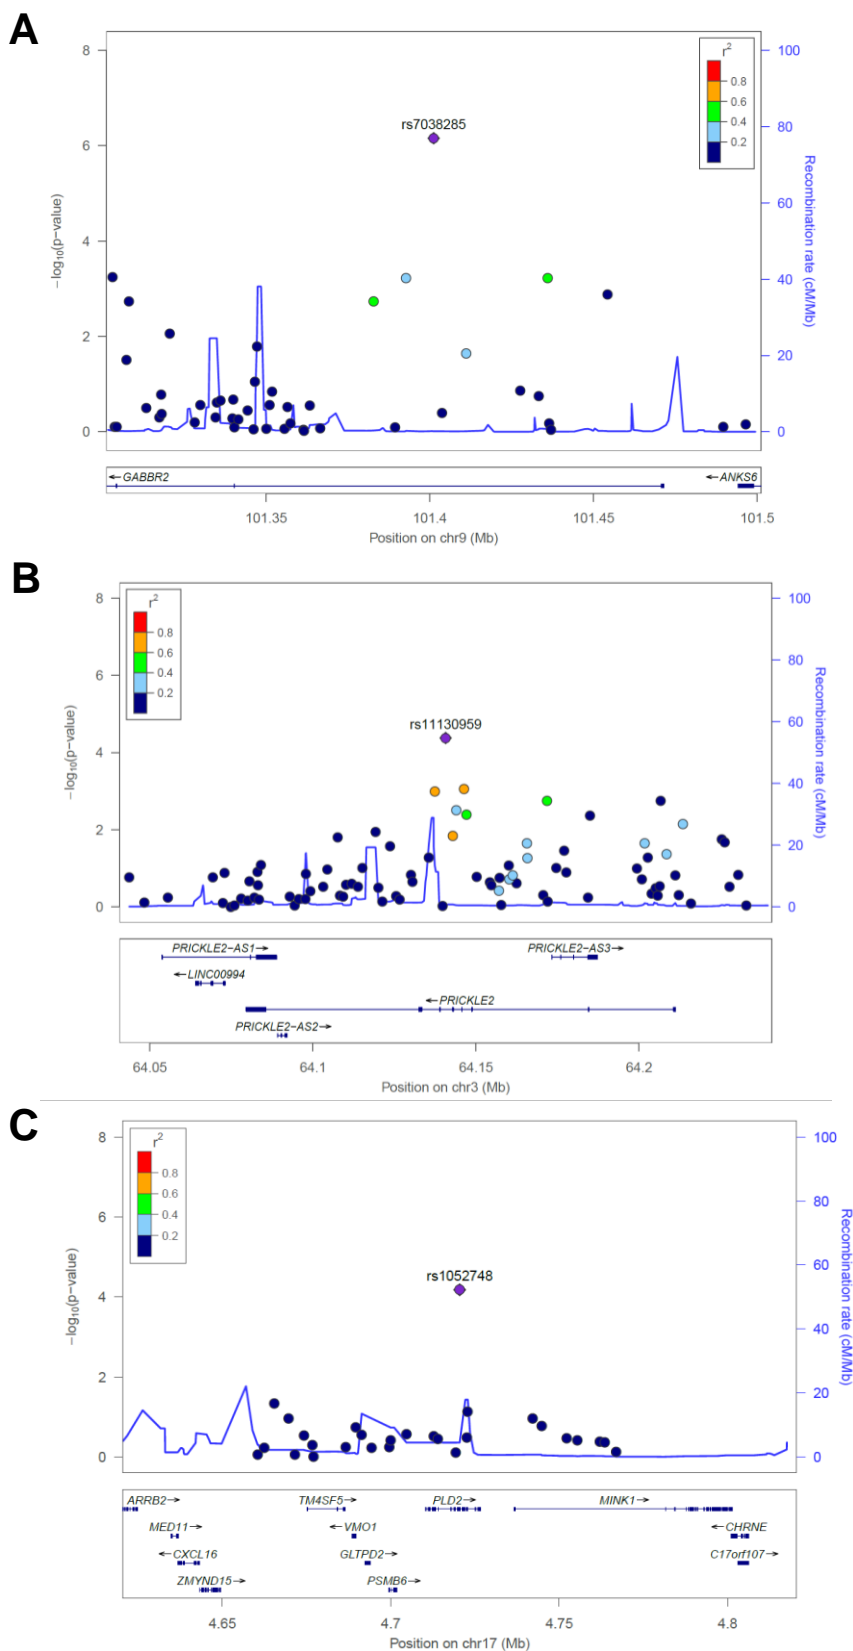

**Figure S4 – LocusZoom plots of top OCM loci associated with ESAM. S1A – *GABBR2* on chromosome 9; S1B- *PRICKLE2* on chromosome 13; S1C- *PLD2* on chromosome 17. Recombination rates and LD ( $r^2$ ) are given relative to 1000 AFR populations**

**A**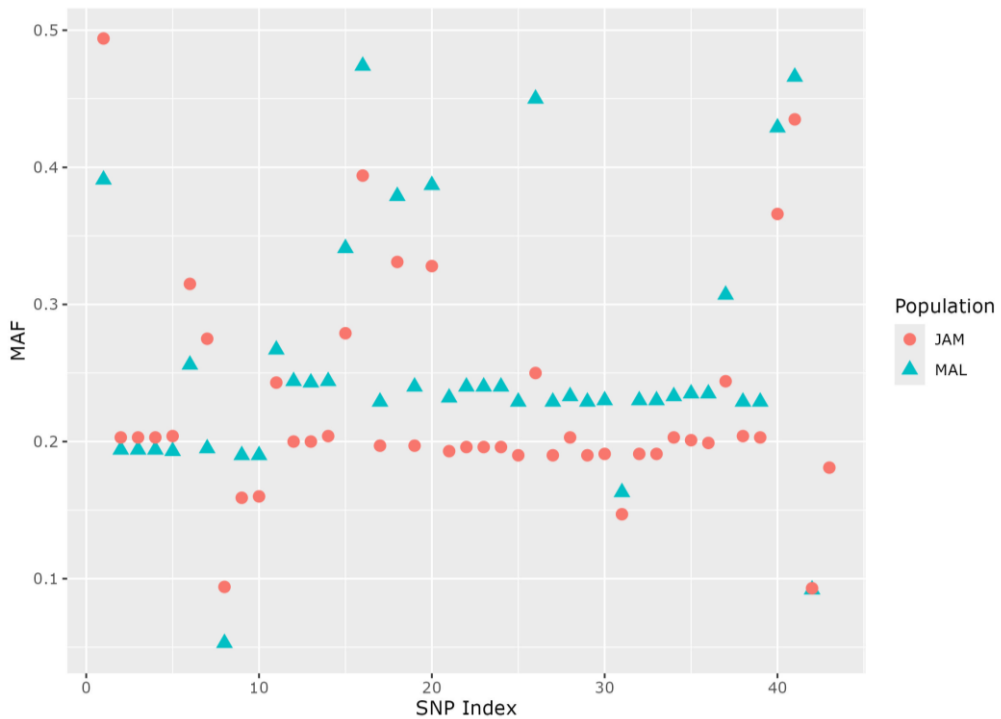**B**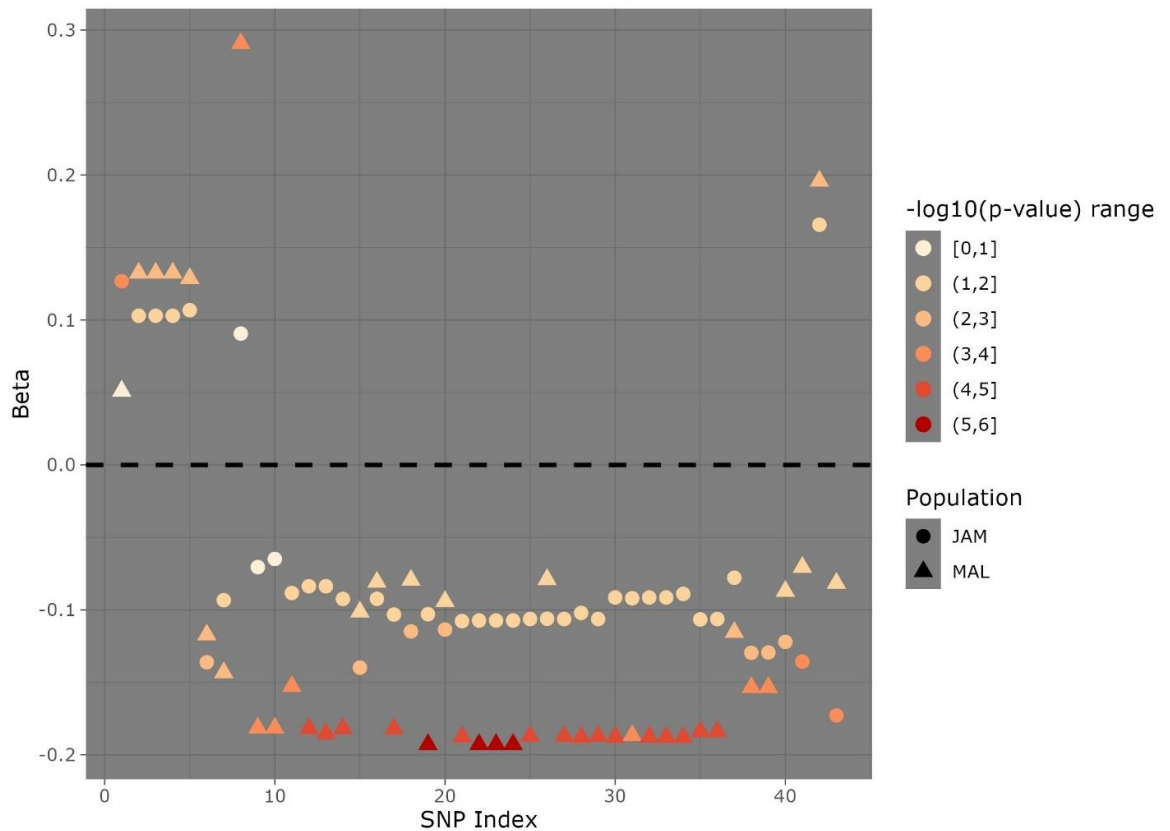

**Figure S5** – Minor allele frequencies (MAF; **S5A**) and effect sizes (Beta; **S5B**) in Jamaica and Malawi for ESAM associated OCM SNPs indexed in Supplementary Tables S3 & S4.

**A**

|     |   |   |   |   |   |
|-----|---|---|---|---|---|
| REF | G | C | A | A | G |
| ALT | A | A | G | G | A |

*GABBR2*

|           | MAF_Jam | MAF_Mal | P_Jam     | P_Mal     |
|-----------|---------|---------|-----------|-----------|
| A A G G A | 0.141   | 0.163   | 0.049     | 7.575E-04 |
| A C A A A | 0.085   | 0.104   | 0.072     | 0.551     |
| G C A A A | 0.150   | 0.141   | 0.774     | 0.304     |
| G C A A G | 0.562   | 0.509   | 8.307E-04 | 0.116     |

**B**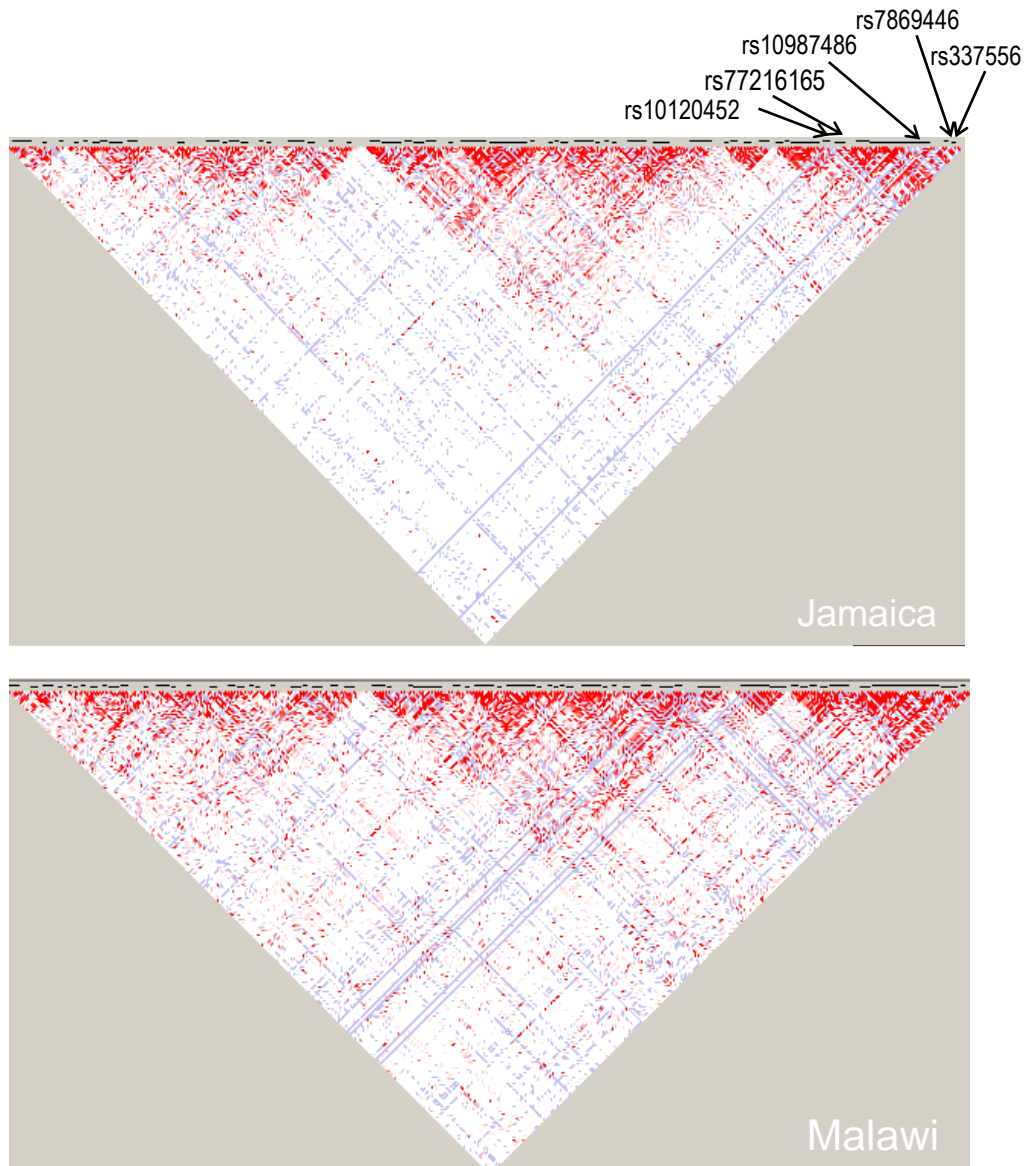

**Figure S6** – Haplotype association (A) and linkage disequilibrium (LD) (B) for SNPs surpassing locus threshold at *GABBR2* in Jamaica and Malawi. Haplotype SNPs [rs10120452; rs77216165; rs10987486; rs7869446; rs337556] are as ordered from 5-prime to 3-prime. MAF – minor allele frequency. In the LD plot, SNPs are plotted on horizontal and color at intersection of two SNPs represents pairwise LD ( $D'$ ), where red =  $D' > 0.9$ ; blue  $D' 0.6-0.89$ ; white  $D' < 0.6$ .

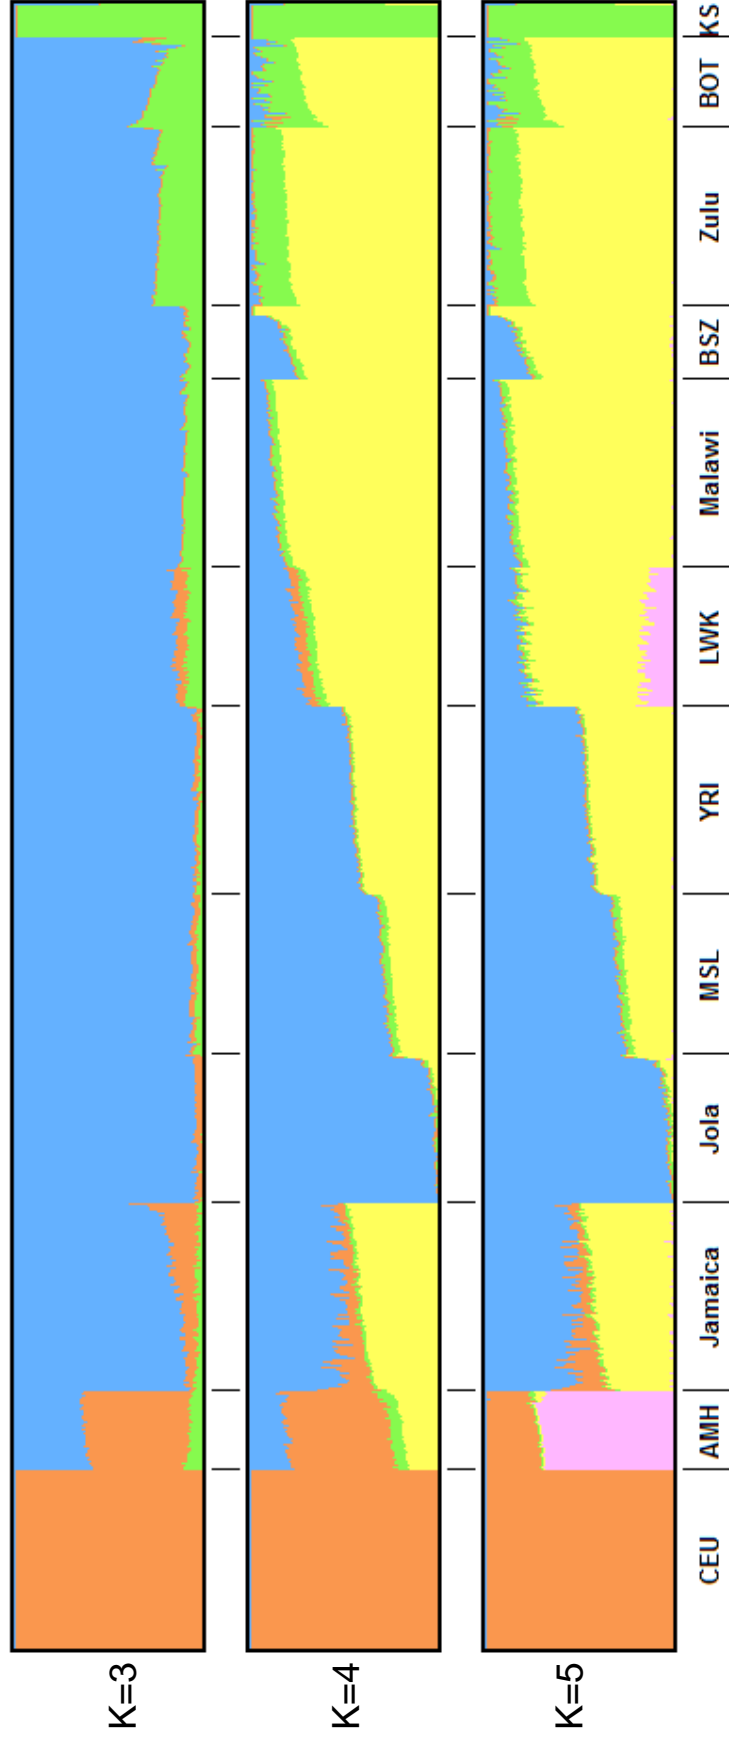

**Figure S7** – Admixture plots for Jamaica and Malawi alongside potential ancestral source populations. Country codes are as given in Figure 4b. The CV error is minimized at K=5.



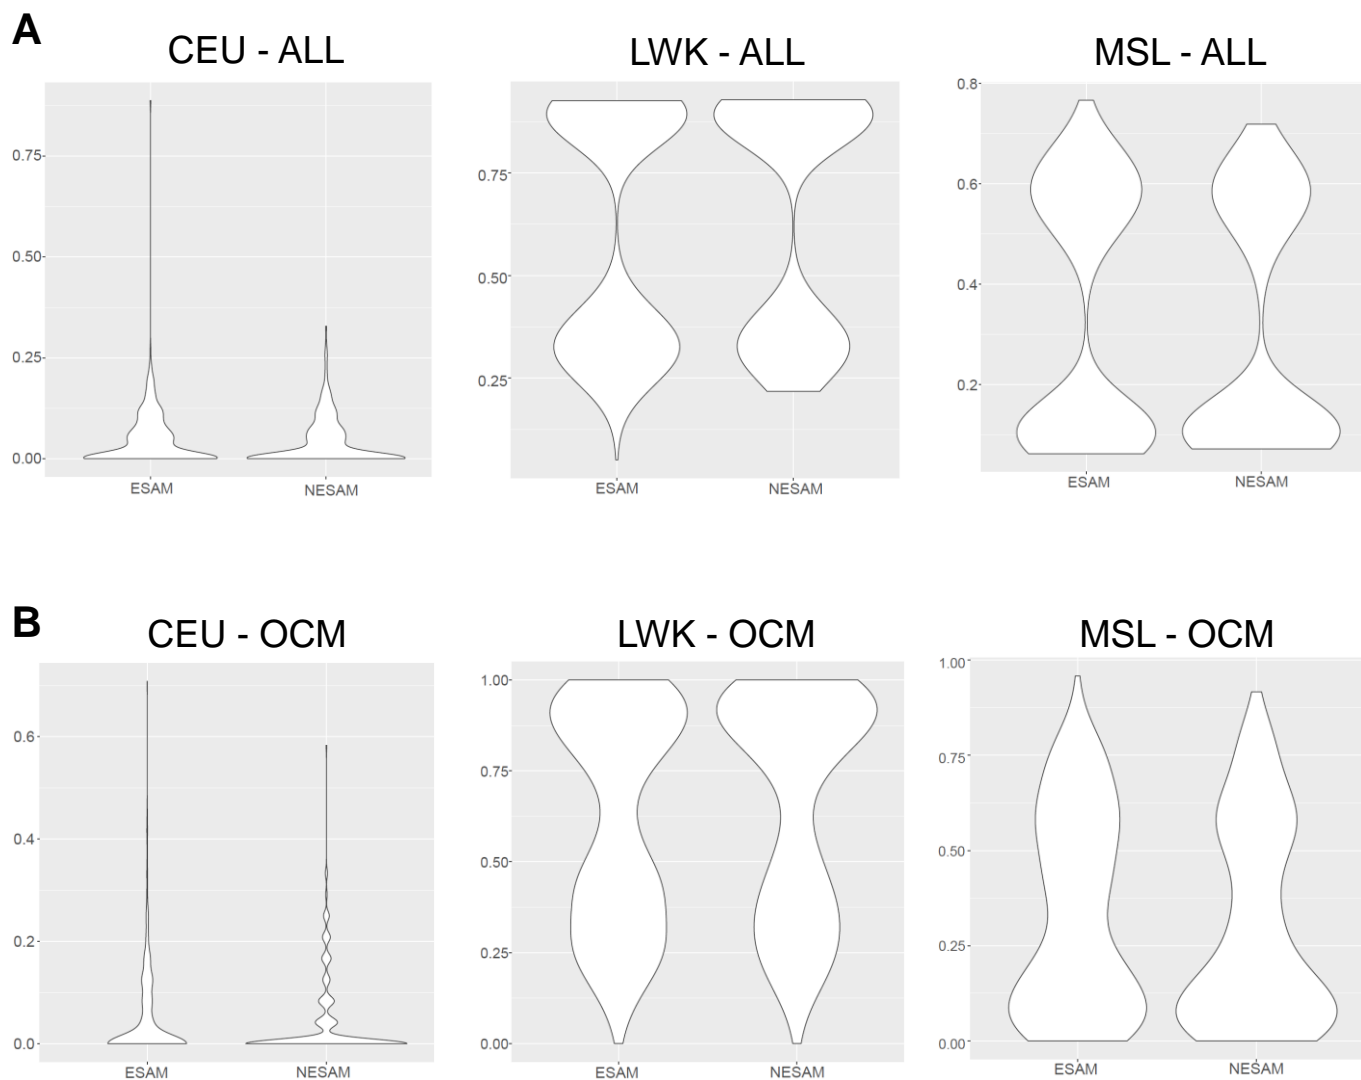

**Figure S8** – Violin plots of individual ancestry proportions in ESAM and NESAM across all SNPs (**A**) and at OCM SNPs (**B**). CEU = CEPH from Utah; LWK = Luyha from Weyube, Kenya, MSL = Mende from Sierra Leone.

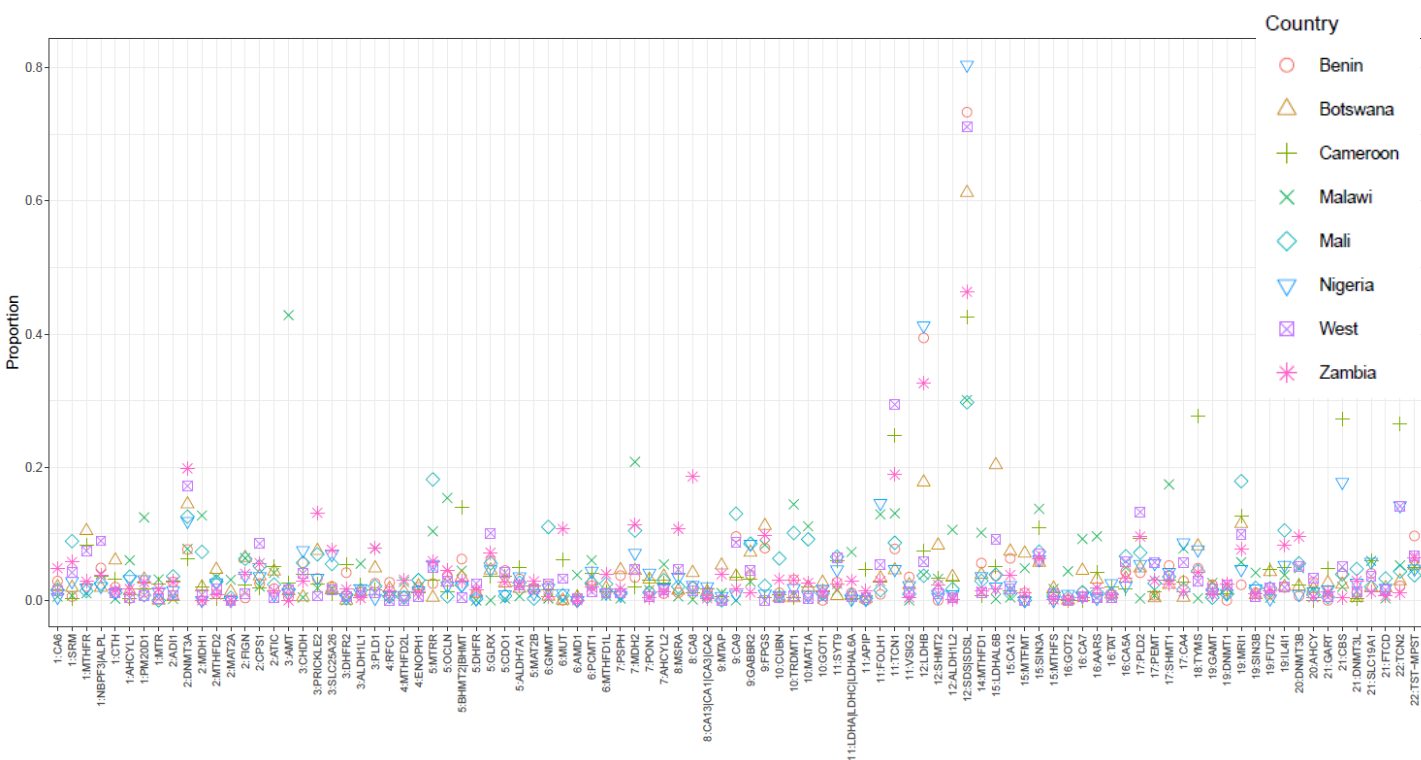

**Figure S9** – Proportion of SNPs at OCM loci with absolute standardized iHS scores > 2 in H3Africa populations and among Malawi WGS cohort.

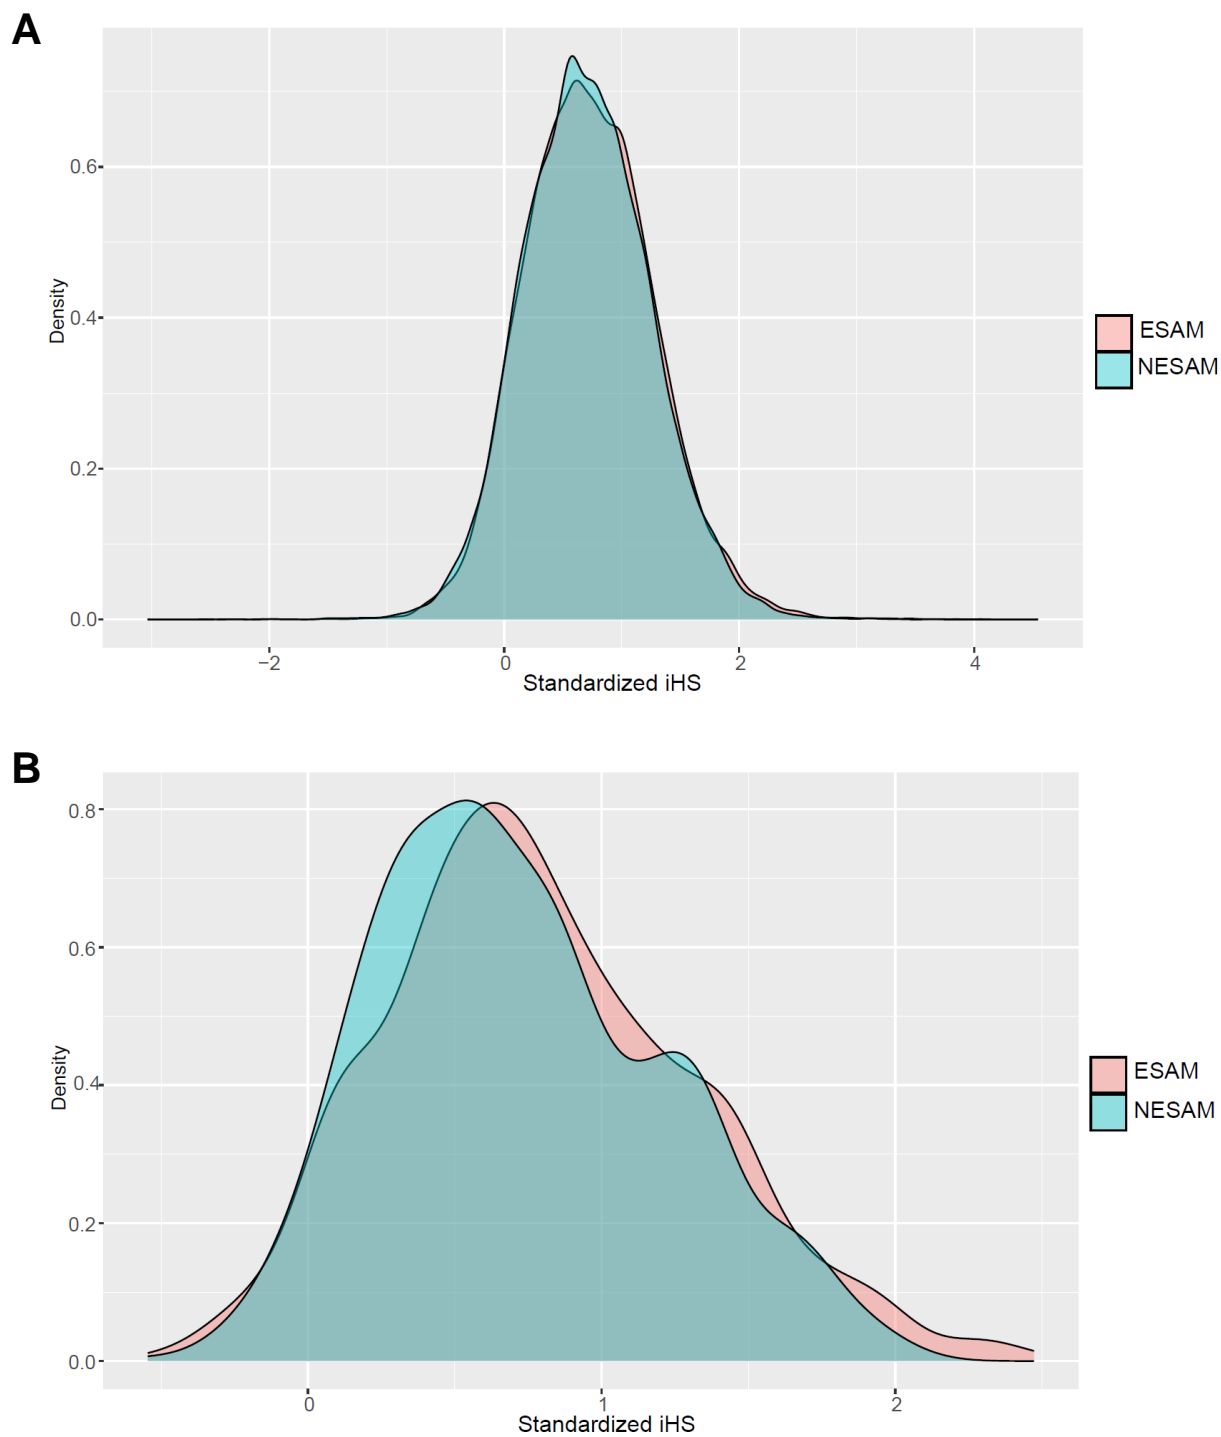

**Figure S10** – Density plots of Standardized iHS scores by SAM category for all SNPs genomewide (**A**) and across OCM loci (**B**).
