# Supplementary material for: Aberrant One-Carbon Metabolism and Ancestral Genetics Underlie Edematous Severe Acute Malnutrition
Source: Research Square preprint supplement (doi:10.21203/rs.3.rs-6890799/v1), 2025-06-29
Supplement: Supplementary file 1 [file be90266d407e4f526f76a5ec.xlsx]

## Sheet: SuppTable_S1
	Supplementary Table S1 - One Carbon Metabolism Loci evaluated.
	Locus	Chr	Start position	End position
	CA6	1	8955892	9085148
	SRM	1	11064648	11170091
	MTHFR	1	11795786	11915470
	NBPF3|ALPL	1	21716582	21954905
	CTH	1	70826900	70955534
	AHCYL1	1	110477386	110616364
	PM20D1	1	205747149	205869276
	MTR	1	236908580	237042568
	ADI1	2	3451689	3571518
	DNMT3A	2	25405829	25615459
	MDH1	2	63765742	63884330
	MTHFD2	2	74375689	74492424
	MAT2A	2	85716100	85819668
	FIGN	2	164414117	164642513
	CPS1	2	211292405	211593831
	ATIC	2	216126678	216264496
	AMT	3	49404210	49510111
	CHDH	3	53800323	53930420
	PRICKLE2	3	64029525	64261131
	SLC25A26	3	66069284	66488532
	DHFR2	3	94007922	94113223
	ALDH1L1	3	125772403	125949645
	PLD1	3	171268194	171445643
	RFC1	4	39239068	39418001
	MTHFD2L	4	74929895	75218814
	ENOPH1	4	83301725	83432244
	MTRR	5	7819216	7951235
	OCLN	5	68738118	68903931
	BHMT2|BHMT	5	78315546	78478113
	DHFR	5	79872044	80000800
	GLRX	5	95099552	95208577
	CDO1	5	115090429	115202405
	ALDH7A1	5	125827532	125981082
	MAT2B	5	162880069	162996359
	GNMT	6	42878499	42981618
	MUT	6	49348072	49481041
	AMD1	6	111085823	111266913
	PCMT1	6	150020830	150182557
	MTHFD1L	6	151136814	151473023
	PSPH	7	56028743	56169268
	MDH2	7	75627392	75745930
	PON1	7	94877668	95075687
	AHCYL2	7	128814854	129120052
	MSRA	8	9861829	10227873
	CA8	8	61051422	61243954
	CA13|CA1|CA3|CA2	8	86082844	86443721
	MTAP	9	21752634	21915969
	CA9	9	35623914	35731154
	GABBR2	9	101000363	101521479
	FPGS	9	130506875	130626556
	CUBN	10	16815964	16999747
	TRDMT1	10	17134981	17266659
	MAT1A	10	81981575	82099434
	GOT1	10	101106626	101240530
	SYT9	11	7210008	7540276
	LDHA|LDHC|LDHAL6A	11	18365935	18551147
	APIP	11	34846713	34987939
	FOLH1	11	49118186	49280222
	TCN1	11	59570280	59684041
	VSIG2	11	124567369	124672109
	LDHB	12	21738274	21860789
	SHMT2	12	57573355	57678718
	ALDH1L2	12	105363561	105528341
	SDS|SDSL	12	113780250	113926081
	MTHFD1	14	64804758	64976725
	LDHAL6B	15	59449014	59550785
	CA12	15	63565729	63724075
	MTFMT	15	65243849	65371977
	SIN3A	15	75611719	75794087
	MTHFS	15	80085888	80239627
	GOT2	16	58691034	58818246
	CA7	16	66828281	66938049
	AARS	16	70236296	70355899
	TAT	16	71550753	71660998
	CA5A	16	87871624	88020112
	PLD2	17	4660395	4771680
	PEMT	17	17358876	17545017
	SHMT1	17	18181186	18316856
	CA4	17	58177301	58298260
	TYMS	18	607603	723499
	GAMT	19	1347024	1451569
	DNMT1	19	10194021	10341205
	MRI1	19	13825336	13935096
	SIN3B	19	16890208	17041164
	FUT2	19	49149227	49257245
	IL4I1	19	50340638	50482796
	DNMT3B	20	31300190	31447162
	AHCY	20	32818070	32941215
	GART	21	34826237	34964464
	CBS	21	44423300	44546472
	DNMT3L	21	45616221	45732099
	SLC19A1	21	46884628	47004542
	FTCD	21	47506175	47625481
	TCN2	22	30953069	31073047
	TST-MPST	22	37356899	37475863

## Sheet: SuppTable_S2
	SNP location	rsID	Gene	PCR Primer	PCR Primer Seq	# Successfully Genotyped	# Genotyped with serum data	MAF (serum samples)	MAF (SNParray samples)
	chr3:64137371	rs753562	PRICKLE2	chr3:64137371- FOR	CTCTGCCAAGTACTGAGCAAAAAT	381	317	0.139	0.134
				chr3:64137371- REV	ACAGCCTGTTGCTTCAACTCA
	chr3:64146322	rs17664202	PRICKLE2	chr3:64146322 - FOR	TGTGCCCATGCAAGTGATCC	397	331	0.252*	0.244
				chr3:64146322- REV	GCACAATTCCCAAGGTGTGCATAA
	chr9:101414156	rs17664203	GABBR2	chr9:101414156- FOR	AGGCTGAGGAAGGGTTGAAG	29	26	NA	0.161
				chr9:101414156- REV	ACAGACTATCCTCCCAAATCACT
	chr9:101462262	rs17664204	GABBR2	chr9:101462262-- FOR	GCATCCCTAGAAAGCCAGGTA	387	324	0.201	0.226
				chr9:101462262- REV	CACTGTCCAACAGGTGATCAAG
	chr17:18311534	rs651495	SHMT1	chr17:18311534- FOR	ATGCAAGCACTGAACACTGG	281	234	0.013	0.036
				chr17:18311534- REV	ATGGAAATTCAAACGGGCCC
	chr17:4720469	rs1052748	PLD2	OCM_SNP_chr17_4720469_FOR	CAGACCACCAAGGCCAAGTACA	404	336	0.079	0.089
				OCM_SNP_chr17_4720469 _REV (Biotin tagged)	CTGCCCTCCTGGAAGTGTGAA

## Sheet: SuppTable_S3
		Jamaica	Malawi	P value cohort comparison
		N=340	N=371
	ESAM n (%)	196 (57.6)	188 (50.7)	0.06
	Male n (%)	199 (58.5)	204 (55.0)	0.34
	Mean age in months; (sd, n)	16.9 (43.1, 269)	17.2 (8.1, 369)	0.93
	Within cohort sex
	Male n (%, N of ESAM)	111 (56.6, 196)	102 (54.3, 188)
	Male n (%, N of NESAM)	88 (61.1, 144)	102 (55.7, 183)
	p-value (sex difference within cohorts)	0.41	0.77
	Supplementary Table S3: Clinical Demographics and data for Malawi and Jamaica cohorts.

## Sheet: SupplTable_S4
								GEMMA
OCM_locus	chr	Chr:pos	rsID	Variant	Alt	Ref	MAF	Beta	OR	se	p_wald
MTHFR	1	1:11806851	rs6660106	Genotyped	A	C	0.438	0.0924165	1.09682	0.0261203	0.000429275
AHCYL1	1	1:110606606	rs751387	Imputed	T	G	0.198	0.118811	1.12616	0.0332152	0.000371162
	1	1:110606946	rs1077581	Imputed	C	G	0.198	0.118811	1.12616	0.0332152	0.000371162
	1	1:110607019	rs1077580	Imputed	A	G	0.198	0.118811	1.12616	0.0332152	0.000371162
	1	1:110609288	rs3754443	Imputed	A	C	0.198	0.119057	1.12643	0.0332773	0.000370189
PRICKLE2	3	3:64140685	rs11130959	Imputed	T	C	0.284	-0.123092	0.884182	0.0298269	4.11427e-05
	3	3:64162407	rs17721463	Imputed	C	T	0.233	-0.111264	0.894702	0.0318494	0.000506438
CA8	8	8:61064857	rs1879263	Imputed	G	A	0.072	0.176204	1.19268	0.050009	0.000453304
	8	8:61236911	rs77598806	Imputed	C	T	0.175	-0.138934	0.870285	0.0351016	8.31716e-05
	8	8:61240266	rs16926010	Imputed	C	T	0.176	-0.136404	0.87249	0.0350886	0.000110832
GABBR2	9	9:101375671	rs1984055	Imputed	G	A	0.255	-0.126267	0.88138	0.0300203	2.93197e-05
	9	9:101379252	rs10987082	Imputed	C	T	0.223	-0.141546	0.868016	0.0316622	9.08395e-06
	9	9:101379278	rs10987083	Imputed	C	T	0.222	-0.143514	0.866309	0.0316571	6.81253e-06
	9	9:101381581	rs7872682	Imputed	A	G	0.225	-0.143926	0.865952	0.031626	6.28473e-06
	9	9:101386241	rs10120452	Genotyped	A	G	0.312	-0.121175	0.885879	0.0290247	3.35215e-05
	9	9:101386657	rs7033796	Imputed	T	C	0.436	-0.0933114	0.91091	0.0267853	0.000524971
	9	9:101388897	rs10081774	Imputed	A	C	0.214	-0.14862	0.861896	0.0324312	5.42526e-06
	9	9:101395746	rs2065452	Imputed	G	A	0.356	-0.103505	0.901672	0.027992	0.000234396
	9	9:101399554	rs79824961	Imputed	T	C	0.219	-0.156872	0.854814	0.0317356	9.60572e-07
	9	9:101400560	rs7048344	Imputed	G	A	0.359	-0.109332	0.896433	0.0274142	7.35027e-05
	9	9:101400759	rs10987193	Imputed	T	G	0.213	-0.155066	0.856359	0.0323992	2.0704e-06
	9	9:101401191	rs7038285	Imputed	C	A	0.219	-0.158878	0.853101	0.0317301	6.97763e-07
	9	9:101401787	rs7026218	Imputed	T	C	0.219	-0.158878	0.853101	0.0317301	6.97763e-07
	9	9:101401874	rs73504537	Imputed	A	G	0.219	-0.158878	0.853101	0.0317301	6.97763e-07
	9	9:101404349	rs7869482	Imputed	A	G	0.21	-0.154781	0.856603	0.0324459	2.23248e-06
	9	9:101405966	rs57503540	Imputed	T	C	0.354	-0.0962029	0.90828	0.0270391	0.000398702
	9	9:101406812	rs7852947	Imputed	T	C	0.21	-0.154781	0.856603	0.0324459	2.23248e-06
	9	9:101407173	rs1930423	Imputed	A	T	0.219	-0.153409	0.857779	0.0316315	1.51938e-06
	9	9:101407601	rs7856813	Imputed	T	C	0.21	-0.154781	0.856603	0.0324459	2.23248e-06
	9	9:101413860	rs59647504	Imputed	T	A	0.212	-0.149264	0.861342	0.0323149	4.57851e-06
	9	9:101414156	rs77216165	Genotyped	A	C	0.155	-0.140337	0.869065	0.0369542	0.00015862
	9	9:101414213	rs56693766	Imputed	T	C	0.212	-0.149264	0.861342	0.0323149	4.57851e-06
	9	9:101415173	rs10119544	Imputed	A	G	0.212	-0.149264	0.861342	0.0323149	4.57851e-06
	9	9:101417785	rs1967890	Imputed	C	A	0.219	-0.145109	0.864928	0.0316867	5.50505e-06
	9	9:101420838	rs35209831	Imputed	T	C	0.219	-0.151779	0.859178	0.0319172	2.39991e-06
	9	9:101425337	rs12345853	Imputed	G	A	0.217	-0.151604	0.859329	0.0319361	2.4972e-06
	9	9:101435504	rs12338804	Imputed	A	G	0.277	-0.100766	0.904144	0.0287781	0.000491633
	9	9:101460283	rs10987486	Genotyped	G	A	0.217	-0.141955	0.86766	0.0318605	9.72332e-06
	9	9:101462262	rs7869446	Genotyped	G	A	0.216	-0.142869	0.866867	0.031886	8.67433e-06
	9	9:101462382	rs337541	Imputed	A	G	0.399	-0.106291	0.899163	0.0267378	7.74917e-05
	9	9:101466698	rs337556	Genotyped	A	G	0.451	-0.104021	0.901206	0.0276648	0.000183882
PLD2	17	17:4720469	rs1052748	Genotyped	A	G	0.092	0.183742	1.20171	0.0458249	6.72557e-05
CBS	21	21:44503300	rs59602964	Imputed	A	G	0.194	-0.127668	0.880146	0.0324984	9.38595e-05
Supplementary Table S4: Association statistics at loci surpassing the locus threshold for association. Chr = chromosome; Pos = psotiion; Alt/ref = alternate/reference allele indicated in association software; OR = odds ratio; se = standard errror of OR; P_wald - P value derived from Wald test implemented in GEMMA. STAT =

## Sheet: SupplTable_S5
							MAF-ALL			Jamaica, cov: SEX + MDS C1 + C2 + C3					Malawi, cov: SEX + MDS C1					Meta-Analysis
	OCM_locus	chr	Chr:pos	rsID	Alt	Ref	ALL	ESAM	NSAM	MAF-ALL	MAF-ESAM	MAF-NSAM	OR	P	MAF-ALL	MAF-ESAM	MAF-NSAM	OR	P	P	Direction
	MTHFR	1	1:11806851	rs6660106	A	C	0.438	0.4816	0.3869	0.490118	0.5492	0.4097	1.13517	0.000449266	0.390842	0.4122	0.3689	1.05229	0.187434	0.0008085	++
	AHCYL1	1	1:110606606	rs751387	T	G	0.198	0.2331	0.1575	0.20296	0.2296	0.1667	1.10838	0.0317611	0.194082	0.2367	0.1503	1.14157	0.00365251	0.0004307	++
		1	1:110606946	rs1077581	C	G	0.198	0.2331	0.1575	0.20296	0.2296	0.1667	1.10838	0.0317611	0.194082	0.2367	0.1503	1.14157	0.00365251	0.0004307	++
		1	1:110607019	rs1077580	A	G	0.198	0.2331	0.1575	0.20296	0.2296	0.1667	1.10838	0.0317611	0.194082	0.2367	0.1503	1.14157	0.00365251	0.0004307	++
		1	1:110609288	rs3754443	A	C	0.198	0.233	0.1575	0.204344	0.232	0.1667	1.11265	0.0261659	0.192714	0.234	0.1503	1.13738	0.00477296	0.0004415	++
	PRICKLE2	3	3:64140685	rs11130959	T	C	0.284	0.2396	0.3364	0.314684	0.2653	0.3819	0.872752	0.00106363	0.256059	0.2128	0.3005	0.889445	0.00621208	2.919e-05	--
		3	3:64162407	rs17721463	C	T	0.233	0.1979	0.2752	0.274954	0.2423	0.3194	0.910933	0.0318087	0.195402	0.1516	0.2404	0.866552	0.00218496	0.0002833	++
	CA8	8	8:61064857	rs1879263	G	A	0.072	0.09505	0.04587	0.0940934	0.1071	0.07639	1.09482	0.168549	0.0525633	0.08245	0.02186	1.33745	0.000281215	0.000473	--
		8	8:61236911	rs77598806	C	T	0.175	0.1393	0.2171	0.158867	0.1429	0.1806	0.931934	0.194861	0.190007	0.1356	0.2459	0.834074	0.000106892	0.0003066	++
		8	8:61240266	rs16926010	C	T	0.176	0.1406	0.2171	0.160308	0.1454	0.1806	0.937169	0.231942	0.190007	0.1356	0.2459	0.834074	0.000106892	0.0004004	++
	GABBR2	9	9:101375671	rs1984055	G	A	0.255	0.2109	0.3073	0.242634	0.2143	0.2812	0.915433	0.0467901	0.266838	0.2074	0.3279	0.858403	0.00020648	7.079e-05	++
		9	9:101379252	rs10987082	C	T	0.223	0.1784	0.2752	0.200031	0.1786	0.2292	0.919731	0.0839599	0.243952	0.1782	0.3115	0.833812	1.85417e-05	2.747e-05	++
		9	9:101379278	rs10987083	C	T	0.222	0.1771	0.2752	0.200031	0.1786	0.2292	0.919731	0.0839599	0.242584	0.1755	0.3115	0.83086	1.25502e-05	2.102e-05	++
		9	9:101381581	rs7872682	A	G	0.225	0.1797	0.2783	0.204394	0.1811	0.2361	0.911719	0.0550047	0.243952	0.1782	0.3115	0.83378	1.82563e-05	1.506e-05	--
		9	9:101386241	rs10120452	A	G	0.312	0.2663	0.3654	0.280116	0.2359	0.3403	0.869526	0.00130457	0.340962	0.2979	0.3852	0.903633	0.0107381	6.079e-05	--
		9	9:101386657	rs7033796	T	C	0.436	0.3945	0.4847	0.394115	0.3546	0.4479	0.911808	0.0185122	0.474428	0.4362	0.5137	0.922359	0.0315382	0.001722	--
		9	9:101388897	rs10081774	A	C	0.214	0.1693	0.2661	0.197032	0.1709	0.2326	0.901938	0.0348291	0.22911	0.1676	0.2923	0.833585	3.32181e-05	1.267e-05	--
		9	9:101395746	rs2065452	G	A	0.356	0.3138	0.4052	0.330891	0.2857	0.3924	0.891524	0.0049562	0.378713	0.3431	0.4153	0.923633	0.0422467	0.0007643	++
		9	9:101399554	rs79824961	T	C	0.219	0.1706	0.2768	0.197032	0.1709	0.2326	0.902148	0.0353022	0.239898	0.1702	0.3115	0.824691	5.48216e-06	3.507e-06	--
		9	9:101400560	rs7048344	G	A	0.359	0.3125	0.4128	0.327967	0.2832	0.3889	0.892635	0.00472984	0.386803	0.3431	0.4317	0.910182	0.0140598	0.0002396	++
		9	9:101400759	rs10987193	T	G	0.213	0.1667	0.2676	0.192652	0.1658	0.2292	0.897858	0.0297426	0.231823	0.1676	0.2978	0.829051	1.6234e-05	6.122e-06	--
		9	9:101401191	rs7038285	C	A	0.219	0.1693	0.2768	0.195591	0.1684	0.2326	0.898223	0.0283625	0.239898	0.1702	0.3115	0.824691	5.48216e-06	2.613e-06	++
		9	9:101401787	rs7026218	T	C	0.219	0.1693	0.2768	0.195591	0.1684	0.2326	0.898223	0.0283625	0.239898	0.1702	0.3115	0.824691	5.48216e-06	2.613e-06	--
		9	9:101401874	rs73504537	A	G	0.219	0.1693	0.2768	0.195591	0.1684	0.2326	0.898223	0.0283625	0.239898	0.1702	0.3115	0.824691	5.48216e-06	2.613e-06	--
		9	9:101404349	rs7869482	A	G	0.21	0.1641	0.2645	0.189728	0.1633	0.2257	0.89915	0.0324797	0.229123	0.1649	0.2951	0.829308	1.67995e-05	7.037e-06	--
		9	9:101405966	rs57503540	T	C	0.354	0.3125	0.4037	0.249962	0.2168	0.2951	0.899333	0.0158032	0.450132	0.4122	0.4891	0.924041	0.0338305	0.001605	--
		9	9:101406812	rs7852947	T	C	0.21	0.1641	0.2645	0.189728	0.1633	0.2257	0.89915	0.0324797	0.229123	0.1649	0.2951	0.829308	1.67995e-05	7.037e-06	--
		9	9:101407173	rs1930423	A	T	0.219	0.1706	0.2752	0.202978	0.1735	0.2431	0.90295	0.0312397	0.233154	0.1676	0.3005	0.828842	1.33459e-05	5.657e-06	--
		9	9:101407601	rs7856813	T	C	0.21	0.1641	0.2645	0.189728	0.1633	0.2257	0.89915	0.0324797	0.229123	0.1649	0.2951	0.829308	1.67995e-05	7.037e-06	--
		9	9:101413860	rs59647504	T	A	0.212	0.1667	0.2645	0.191186	0.1684	0.2222	0.912617	0.0656361	0.230454	0.1649	0.2978	0.82891	1.34918e-05	1.556e-05	++
		9	9:101414156	rs77216165	A	C	0.155	0.1224	0.1942	0.147082	0.1276	0.1736	0.91214	0.0809658	0.163071	0.117	0.2104	0.829824	0.000302958	0.0001864	--
		9	9:101414213	rs56693766	T	C	0.212	0.1667	0.2645	0.191186	0.1684	0.2222	0.912617	0.0656361	0.230454	0.1649	0.2978	0.82891	1.34918e-05	1.556e-05	--
		9	9:101415173	rs10119544	A	G	0.212	0.1667	0.2645	0.191186	0.1684	0.2222	0.912617	0.0656361	0.230454	0.1649	0.2978	0.82891	1.34918e-05	1.556e-05	--
		9	9:101417785	rs1967890	C	A	0.219	0.1732	0.2722	0.202953	0.1786	0.2361	0.914881	0.0609086	0.233154	0.1676	0.3005	0.828681	1.30564e-05	1.37e-05	++
		9	9:101420838	rs35209831	T	C	0.219	0.1719	0.2737	0.201495	0.1735	0.2396	0.898899	0.0272852	0.234472	0.1702	0.3005	0.831987	1.96127e-05	6.297e-06	--
		9	9:101425337	rs12345853	G	A	0.217	0.1706	0.2722	0.198514	0.1709	0.2361	0.899155	0.0281106	0.234472	0.1702	0.3005	0.831987	1.96127e-05	6.541e-06	++
		9	9:101435504	rs12338804	A	G	0.277	0.2383	0.3226	0.244134	0.2194	0.2778	0.92514	0.0756007	0.307277	0.258	0.3579	0.891003	0.00293565	0.0009276	--
		9	9:101460283	rs10987486	G	A	0.217	0.1732	0.2691	0.204401	0.1709	0.25	0.878467	0.00664939	0.229118	0.1755	0.2842	0.857763	0.000410721	1.356e-05	++
		9	9:101462262	rs7869446	G	A	0.216	0.1719	0.2684	0.20224	0.1684	0.2483	0.878639	0.00688023	0.229118	0.1755	0.2842	0.857763	0.000410721	1.405e-05	++
		9	9:101462382	rs337541	A	G	0.399	0.3516	0.4541	0.366149	0.3163	0.434	0.885068	0.00164426	0.42855	0.3883	0.4699	0.916596	0.0211855	0.0001502	--
		9	9:101466698	rs337556	A	G	0.451	0.4076	0.5015	0.433862	0.3827	0.5035	0.873132	0.000812121	0.466302	0.4335	0.5	0.931907	0.0660144	0.0003146	--
	PLD2	17	17:4720469	rs1052748	A	G	0.092	0.1201	0.05882	0.0922372	0.1154	0.06071	1.18022	0.0170716	0.0916457	0.125	0.05738	1.21639	0.00191268	0.000132	++
	CBS	21	21:44503300	rs59602964	A	G	0.194	0.1562	0.2385	0.180898	0.1327	0.2465	0.841291	0.000262296	0.206204	0.1809	0.2322	0.921678	0.0689741	0.0001461	--

## Sheet: SupplTable_S6
chr	OCM_locus	Malawi	Benin	Botswana	Cameroon	Mali	Nigeria	Gur West Africa	Zambia
1	CA6	0.0056338	0.0289389	0.020339	0.0151771	0.0155172	0.00486224	0.015	0.0482866
1	SRM	0.00704225	0.00584795	0.0192926	0.00271739	0.0888889	0.0286533	0.0417827	0.0574413
1	MTHFR	0.0107914	0.0208768	0.104444	0.0822511	0.0140845	0.0189474	0.0744186	0.0282258
1	NBPF3|ALPL	0.0395584	0.0487288	0.0191226	0.0359477	0.0251716	0.0212014	0.08948	0.0382096
1	CTH	0.00242131	0.01983	0.060274	0.0316092	0.0115607	0.0117994	0.0111732	0.0156658
1	AHCYL1	0.060274	0.003003	0.0141343	0.00322581	0.0355872	0.031746	0.003861	0.0172414
1	PM20D1	0.124555	0.0123457	0.0316206	0.0170213	0.00775194	0.0314961	0.00769231	0.0276074
1	MTR	0.0315315	0.00773196	0	0.0252101	0	0.0132979	0.0026738	0.0168269
2	ADI1	0.0021645	0.0276382	0.00531915	0.0291777	0.0360825	0.0149701	0.00777202	0.0276382
2	DNMT3A	0.0773196	0.0764706	0.144578	0.0621622	0.125828	0.11898	0.17192	0.198251
2	MDH1	0.12766	0	0.0198675	0.0196078	0.0728477	0	0.00833333	0
2	MTHFD2	0.0346821	0.00977199	0.0462633	0.00319489	0.0283688	0.0264901	0.0166113	0.00879765
2	MAT2A	0.0308123	0	0.012987	0	0.00395257	0	0	0
2	FIGN	0.0633663	0.00359066	0.0641593	0.0229167	0.0623656	0.0369565	0.0106157	0.0397727
2	CPS1	0.0208791	0.0253165	0.0364322	0.0181818	0.0512129	0.0359435	0.085213	0.0558376
2	ATIC	0.0413534	0.0175747	0.0435835	0.0508475	0.0237624	0.00884956	0.00421941	0.0140281
3	AMT	0.428571	0.00480769	0.0141509	0.026455	0.0165746	0.0111732	0.0164835	0
3	CHDH	0.0043956	0.0566038	0.00511509	0.0387597	0.056338	0.0751295	0.0406091	0.0287206
3	PRICKLE2	0.0183727	0.033033	0.0745814	0.0245023	0.0691928	0.0335277	0.00634921	0.131579
3	SLC25A26	0.0185029	0.0209241	0.0174312	0.00990099	0.0545791	0.0688776	0.0158434	0.0760234
3	DHFR2	0	0.0416667	0	0.0531915	0.00803213	0.00392157	0.00531915	0.0165746
3	ALDH1L1	0.055102	0.00776053	0.0124858	0.0225386	0.0152047	0.0177936	0.0121507	0.00343643
3	PLD1	0.0780856	0.0257511	0.0485021	0.0158228	0.0214168	0.00331675	0.011745	0.0783745
4	RFC1	0.00556586	0.0271084	0.0177665	0.0071599	0.00555556	0.00779221	0	0.01373
4	MTHFD2L	0.0279465	0.0060241	0.0128755	0.0307263	0.0041958	0.00775194	0	0.0310479
4	ENOPH1	0.0189573	0.0194986	0.0215385	0.0113314	0.0303867	0.0144928	0.00589971	0.0126582
5	MTRR	0.103846	0.0252101	0.00421941	0.0299539	0.181818	0.0541761	0.0496894	0.0586957
5	OCLN	0.153846	0.0372671	0.027027	0.0123457	0.00598802	0.0220588	0.0289017	0.0449438
5	BHMT2|BHMT	0.0445969	0.062069	0.0350877	0.139423	0.0232068	0.0223325	0.00461894	0.0292276
5	DHFR	0	0.0110619	0.0104384	0.0165094	0.00241546	0.00222717	0.0252632	0.0159681
5	GLRX	0	0.0595611	0.0452962	0.0366667	0.0557377	0.0462963	0.100946	0.0716511
5	CDO1	0.00265957	0.0449102	0.0258065	0.0362538	0.00675676	0.00887574	0.0420712	0.0269542
5	ALDH7A1	0.00627943	0.0321361	0.0177866	0.0488798	0.0265152	0.0355805	0.0229008	0.0223048
5	MAT2B	0.0117647	0.0163043	0.0185676	0.0209974	0.00266667	0.0106101	0.0171429	0.0286458
6	GNMT	0.00266667	0.0216718	0.00619195	0.0161812	0.110294	0.0185759	0.0246479	0.00619195
6	MUT	0	0	0	0.0608108	0.00749064	0.0104167	0.0326087	0.107345
6	AMD1	0.0382294	0	0.00478469	0.00503778	0	0	0.00269542	0
6	PCMT1	0.0603113	0.0218978	0.0290557	0.0409836	0.0260417	0.0439276	0.0131926	0.0195599
6	MTHFD1L	0.0071736	0.011236	0.0181668	0.0133445	0.0246914	0.0111465	0.0107084	0.039185
7	PSPH	0.00276243	0.0371622	0.0458015	0.0171233	0.0102041	0.00787402	0.0107527	0.0174216
7	MDH2	0.208108	0.034375	0.0446097	0.0202703	0.104762	0.071161	0.0467033	0.114007
7	PON1	0.0154321	0.0135397	0.0315236	0.0301954	0.0116959	0.0412371	0.00609756	0.00357782
7	AHCYL2	0.0541012	0.0101626	0.0359712	0.025641	0.0303688	0.0190476	0.0151515	0.0122888
8	MSRA	0.00587467	0.0115607	0.0150322	0.040411	0.020562	0.034629	0.0461538	0.107348
8	CA8	0.00123762	0.020436	0.0415584	0.0108565	0.0186418	0.0229008	0.0136986	0.186047
8	CA13|CA1|CA3|CA2	0.00661157	0.00744879	0.0129241	0.0172956	0.005386	0.0206897	0.0116959	0.00320513
9	MTAP	0.0108865	0.0017452	0.0526316	0.00606061	0	0.00613497	0	0.0390764
9	CA9	0	0.0959596	0.0361991	0.0351759	0.130233	0.00900901	0.0867347	0.0169492
9	GABBR2	0.0281549	0.0381679	0.0720141	0.031454	0.0852306	0.0846377	0.0451084	0.012
9	FPGS	0.0835821	0.0784314	0.112245	0.00353357	0.021875	0.00967742	0	0.0981595
10	CUBN	0.00628141	0.0113798	0.00417827	0.00823045	0.0629471	0.00750751	0.00453172	0.0310811
10	TRDMT1	0.144345	0.0310345	0.00359066	0.00371058	0.10118	0.0182149	0.00706714	0.0309278
10	MAT1A	0.111354	0.00649351	0.0202899	0.0203488	0.091716	0.00775194	0.00299401	0.026087
10	GOT1	0.00283286	0	0.0268199	0.0147601	0.0100671	0.0171821	0.00735294	0.013289
11	SYT9	0.0150131	0.0272011	0.00700935	0.0596905	0.0656276	0.0461894	0.0638783	0.0248322
11	LDHA|LDHC|LDHAL6A	0.0726783	0.0113636	0.00686106	0.003367	0.00772201	0.00172117	0.00524476	0.0295082
11	APIP	0.00249688	0	0.00292398	0.0465465	0.00297619	0.00151286	0.00453858	0.014245
11	FOLH1	0.129237	0.00900901	0.0334347	0.0274725	0.0149626	0.145963	0.0532915	0.0290237
11	TCN1	0.130742	0.0773196	0.0454545	0.247619	0.0865385	0.0466321	0.294118	0.188889
11	VSIG2	0	0.0350877	0.0232558	0.0042735	0.00961538	0.0224215	0.012605	0.00436681
12	LDHB	0.0385289	0.394397	0.17759	0.0742268	0.0369565	0.412664	0.0576923	0.32619
12	SHMT2	0.0324324	0	0.0828025	0.033557	0.0141844	0.00492611	0.0103627	0.0233918
12	ALDH1L2	0.106036	0.00409836	0.0354767	0.029106	0.0171306	0.00884956	0.00423729	0.00165837
12	SDS|SDSL	0.300995	0.733553	0.612583	0.425868	0.297521	0.804444	0.711475	0.463576
14	MTHFD1	0.10166	0.056	0.038835	0.00636943	0.0292398	0.0362538	0.0118694	0.0139276
15	LDHAL6B	0.00217865	0.0368421	0.203518	0.0503597	0.0387597	0.0203562	0.091358	0.0167064
15	CA12	0.00441501	0.0631068	0.0736842	0.0150376	0.0103093	0.0226757	0.0171569	0.0379464
15	MTFMT	0.0483871	0.011194	0.0707071	0.00390625	0	0	0	0.0108696
15	SIN3A	0.137546	0.057971	0.0566802	0.10917	0.0731707	0.0612245	0.0697674	0.0622568
15	MTHFS	0.0171233	0.00173611	0.0180361	0.011925	0.00790514	0	0.0102564	0.00151515
16	GOT2	0.04375	0	0	0	0.0045045	0.00930233	0	0.00139665
16	CA7	0.0923077	0.0128205	0.0449438	0	0.0121212	0.00632911	0.00598802	0.00473934
16	AARS	0.0962733	0.00347222	0.0314685	0.0416667	0.011811	0.00324675	0.00429185	0.0186335
16	TAT	0.00352113	0.00826446	0.00917431	0.0204082	0.00970874	0.0255319	0.00434783	0.00796813
16	CA5A	0.0495382	0.0433145	0.0331754	0.016791	0.0663366	0.0219124	0.0586566	0.0326733
17	PLD2	0.00285714	0.0415225	0.0482315	0.0933333	0.0716724	0.0543807	0.132867	0.0959752
17	PEMT	0.00712251	0.00753012	0.0035524	0.0133111	0.025729	0.0555556	0.0571429	0.029734
17	SHMT1	0.174286	0.0523013	0.0236407	0.0305677	0.035545	0.0422222	0.0357942	0.0248869
17	CA4	0.0779221	0.0289256	0.0041841	0.027027	0.0163934	0.086758	0.0571429	0.0133333
18	TYMS	0.00302572	0.0483592	0.0815603	0.277064	0.0441989	0.076087	0.0283688	0.0419463
19	GAMT	0.0263158	0.0235294	0.0195312	0.00955414	0.00409836	0.012	0.0170213	0.00906344
19	DNMT1	0.0176322	0	0.0148148	0.0104167	0.00923077	0.0103448	0.0234114	0.0250896
19	MRI1	0.0573013	0.0233918	0.115152	0.126949	0.179104	0.0466667	0.0994624	0.0765864
19	SIN3B	0.0416667	0.0112994	0.00815217	0.0105263	0.0186335	0.0176471	0.00589971	0.00982801
19	FUT2	0.00379507	0.00938967	0.0429594	0.045977	0.0180412	0.00245098	0.0185615	0.0149573
19	IL4I1	0.0381526	0.0192771	0.0204082	0.0492611	0.10514	0.0528967	0.0195599	0.083151
20	DNMT3B	0.0483005	0.00655022	0.0212766	0.0235294	0.0556793	0.00904977	0.0512821	0.0958606
20	AHCY	0.0148699	0.027451	0.0175439	0	0.00843882	0.0132159	0.0328638	0.00452489
21	GART	0.0109091	0	0.0265957	0.0473684	0.0049505	0.016129	0.00540541	0.012766
21	CBS	0.0204082	0.040153	0.0240481	0.272541	0.0391304	0.177551	0.0503145	0.00397614
21	DNMT3L	0.00423729	0.0113086	0.00373832	0.00321027	0.0472028	0.0263158	0.0134003	0.0294118
21	SLC19A1	0.0592217	0.0404858	0.0194553	0.0595483	0.0203666	0.0576923	0.0364807	0.0122807
21	FTCD	0.00308166	0.0162162	0.018622	0.00722022	0.032967	0.0185874	0.0152672	0.00679117
22	TCN2	0.0526316	0.0217865	0.0289855	0.265861	0.0435835	0.1425	0.141531	0.0110865
22	TST-MPST	0.0510806	0.0967742	0.052381	0.0498866	0.037594	0.0472103	0.0671642	0.0636943
Supplementary Table S6 - proportion of SNPs at OCM loci with |iHS scores| > 2 in Malawi WGS cohort and H3Africa populations. Cells in yellow highlight those countries where, within the indicated OCM locus, the proportion of high absolute iHS scores (|>2|) exceeded 10% of all iHS scores within the region. The range of the OCM locus region is defined as +/- 50kb around included OCM genes.”

## Sheet: SupplTable S7
	chr	Pos	rsID	Malawi	Benin	Botswana	Cameroon	Mali	Nigeria	Gur W. Africa	Zambia
	1	11806851	rs6660106	-0.153739	-0.96181	-0.895623	-0.458194	-1.24162	-0.384578	-1.32081	-0.99143
	1	110609288	rs3754443	1.60083	-0.917551	-0.611778	-0.396645	-0.630491	-1.08293	-0.927293	-0.809843
	3	64140685	rs11130959	-0.588537	-0.717251	-1.17961	-0.169668	-0.390619	-1.04051	-1.60986	-1.49828
	8	61064857	rs1879263	NA	NA	-0.962579	0.16068	1.66595	0.177391	-1.03514	NA
	8	61236911	rs77598806	0.520936	NA	NA	NA	NA	NA	NA	NA
	8	61240266	rs16926010	0.296941	0.338972	0.128596	0.333951	0.664494	1.30585	0.557199	-0.0636215
	9	101425337	rs12345853	0.752871	-0.934565	0.533411	0.162728	-0.578212	-0.179052	-0.258263	-0.676163
	9	101435504	rs12338804	0.940456	-0.893507	1.21591	0.459584	-0.389634	0.00561309	-0.329372	0.184866
	9	101466698	rs337556	-0.454871	1.5379	0.923028	0.824241	0.857521	1.35998	0.338223	1.75587
	17	4720469	rs1052748	-1.58358	-1.99593	-0.000456042	-0.836315	NA	-1.93761	NA	-0.734515
	Supplementary Table S7 - iHS scores for available ESAM-associated SNPs at OCM loci in Malawi WGS cohort and H3Africa populations.
