# Supplementary material for: Aberrant One-Carbon Metabolism and Ancestral Genetics Underlie Edematous Severe Acute Malnutrition
Source: Research Square preprint supplement (doi:10.21203/rs.3.rs-6890799/v1), 2025-06-29
Supplement: Supplementary file 2 [file f8e2cbe2ee4095287b7273c8.docx]

**Supplementary Methods**

**Aberrant One-Carbon Metabolism and Ancestral Genetics Underlie Edematous Severe Acute Malnutrition**

**(Lie et. al.)**

### **SNP Genotyping and Validation**

Six target SNPs were genotyped and validated using complementary methodologies.

- **Sanger sequencing (SeqStudio)** was employed for genotyping rs753562, rs17664202, rs17664203, rs17664204, and rs651495.
- **Pyrosequencing (PyroMark Q48 Autoprep)** was utilized for genotyping rs1052748.

Primers for each SNP are given in Supplementary Table 1 and are reproduced below.

| **SNP location** | **rsID** | **Gene** | **PCR Primer** | **PCR Primer Seq** |
| --- | --- | --- | --- | --- |
| chr3:64137371 | rs753562 | *PRICKLE2* | chr3:64137371- FOR | CTCTGCCAAGTACTGAGCAAAAAT |
| chr3:64137371- REV | ACAGCCTGTTGCTTCAACTCA |
| chr3:64146322 | rs17664202 | *PRICKLE2* | chr3:64146322 - FOR | TGTGCCCATGCAAGTGATCC |
| chr3:64146322- REV | GCACAATTCCCAAGGTGTGCATAA |
| chr9:101414156 | rs17664203 | *GABBR2* | chr9:101414156- FOR | AGGCTGAGGAAGGGTTGAAG |
| chr9:101414156- REV | ACAGACTATCCTCCCAAATCACT |
| chr9:101462262 | rs17664204 | *GABBR2* | chr9:101462262-- FOR | GCATCCCTAGAAAGCCAGGTA |
| chr9:101462262- REV | CACTGTCCAACAGGTGATCAAG |
| chr17:18311534 | rs651495 | *SHMT1* | chr17:18311534- FOR | ATGCAAGCACTGAACACTGG |
| chr17:18311534- REV | ATGGAAATTCAAACGGGCCC |
| chr17:4720469 | rs1052748 | *PLD2* | OCM_SNP_chr17_4720469_FOR | CAGACCACCAAGGCCAAGTACA |
| OCM_SNP_chr17_4720469_REV (Biotin tagged) | CTGCCCTCCTGGAAGTGTGAA |

**Highlighted SNPs – assay unsuccessful; not used in analyses**

### **Validation via Dideoxy (Sanger) Sequencing**

Sanger sequencing was performed using the SeqStudio Genetic Analyzer to validate selected single nucleotide polymorphisms (SNPs). The workflow included primer design, PCR amplification, cycle sequencing, purification, capillary electrophoresis and analysis.

### **Primer Design and PCR Amplification**

### M13-tagged primers targeting SNP regions were designed using the UCSC in silico primer design tool, based on the GRCh38/hg38 genome assembly. Primer specificity was confirmed via BLAT alignment, and primers were synthesized by IDT. Stock solutions were prepared at 100 µM in TE buffer.

**PCR Reaction Mix:**

| **Component** | **Volume** |
| --- | --- |
| Genomic DNA (4 ng/µL) | 1.0 µL |
| M13-tailed PCR primer mix (0.8 µM each primer) | 1.5 µL |
| BigDye® Direct PCR Master Mix | 5.0 µL |
| Deionized water | 2.5 µL |
| **Total volume for each reaction** | **10.0 µL** |

**Thermocycling conditions:**

| **Stage** | **Temp** | **Time** |
| --- | --- | --- |
| Hold | 95°C | 10 min |
| Cycle (35 cycles) | 96°C | 3 sec |
| 62°C | 15 sec |
| 68°C | 30 sec |
| Hold | 72°C | 2 min |
| Hold | 4°C |  |

PCR amplification was confirmed via 2% agarose gel electrophoresis.

### **Cycle Sequencing:**

### Forward and reverse sequencing reactions were prepared using BigDye® Direct Sequencing Master Mix with M13-tagged primers. The reaction components were as follows:

| **Component** | **Volume (per reaction)** |
| --- | --- |
| BigDye® Direct Sequencing Master Mix | 2.0 µL |
| M13 Forward or Reverse Primer | 1.0 µL |
| **Total Volume** | 3.0 µL |

The sequencing reaction was set up on ice and processed in a thermal cycler under the following conditions:

| Stage | Veriti® thermal cyclers | | 9700 thermal cycler | |
| --- | --- | --- | --- | --- |
| Temp | Time | Temp | Time |
| Hold | 37°C | 15 min | 37°C | 15 min |
| Hold | 80°C | 2 min | 80°C | 2 min |
| Hold | 96°C | 1 min | 96°C | 1 min |
| Cycle (25 cycles) | 96°C | 10 sec | 96°C | 10 sec |
| 50°C | 5 sec | 50°C | 5 sec |
| 60°C | 75 sec | 60°C | 4 min |
| Hold | 4°C | ∞ | 4°C | ∞ |

### **Purification and Capillary Electrophoresis:**

Sequencing products were purified using the BigDye XTerminator® Purification Kit. A premix of SAM™ Solution and XTerminator® Solution was prepared and vortexed to homogeneity. Samples were incubated at 24°C for 20 minutes with mixing at 2000 rpm, followed by centrifugation at 1000×g for 2 minutes.

Capillary electrophoresis was performed on the SeqStudio Genetic Analyzer. Run conditions were optimized using the "Z_BigDye_Direct" dye set. Sample names and plate configurations were assigned using Plate Manager software. Sequencing runs were initiated following system calibration and buffer replacement.

### **Data Analysis:**

Following sequencing, .ab1 files were exported and analyzed using Sequencher software. Primer reference sequences were used for alignment, and SNPs were identified based on sequence variations. Genotypes were assigned through comparative analysis with the reference genome.

### **Validation of SNP via Pyrosequencing on PyroMark Q48 Autoprep**

**Overview**:

Genotyping for rs1052748 (chr17:4720469, gene *PLD2)* was performed using the PyroMark Q48 Autoprep system, which employs Pyrosequencing® technology for precise sequence-based variant detection. This approach enables rapid and quantitative genotyping, making it well-suited for genetic analyses.

**Primer Design for Genotyping:**

Biotinylated primers for SNP genotyping were designed using PyroMark Assay Design SW 2.0. The target sequence was input into the software, and the dispensation order was generated. The assay parameters were finalized by locking the design, and the assay file (*.qsnp*) was saved for subsequent sequencing. Biotinylated primer sets were procured through Qiagen’s GeneGlobe platform.

**PCR Amplification**

**PCR Reaction Mix:**

| **Component** | **Volume per Reaction** |
| --- | --- |
| PyroMark PCR Master Mix | 12.5 µL |
| Cora Load | 2.5 µL |
| Q Solution | 5 µL |
| Primer Mix | 2.5 µL |
| DNA (10ng/ul) | 2.5ul |

**Optimized PCR Thermocycling Conditions:**

| **Step** | **Temperature** | **Duration** | **Cycles** |
| --- | --- | --- | --- |
| Initial Denaturation | 95°C | 15 minutes | 1 |
| Denaturation | 95°C | 30 seconds | 40 |
| Annealing | 55-65°C | 30 seconds | 40 |
| Extension | 72°C | 30 seconds | 40 |
| Final Extension | 72°C | 10 minutes | 1 |

Amplification was confirmed via 2% agarose gel electrophoresis.

**Preparation of Pyrosequencer Cartridges:** Prior to use, Pyrosequencer cartridges were cleaned according to the manufacturer’s instructions. Primers and reagents were manually loaded in the designated cartridges.

**PyroMark Disc Preparation**: A PyroMark Q48 Disc was placed into the PyroMark Q48 Autoprep instrument. Each designated well was loaded with 3 µL of PyroMark Q48 Magnetic Beads and 10 µL of biotinylated PCR product. Sample placement was verified using the PyroMark Q48 Software, ensuring correct loading. The instrument lid was secured, and the bead immobilization process was initiated prior to sequencing.

**Assay Setup in PyroMark Q48 Autoprep Software**: In the PyroMark Q48 Autoprep Software, assays were selected from the toolbar, and the target sequence was input. The dispensation order was generated and locked to finalize assay parameters, and the assay file (*.qsnp*) was saved.

**Run Setup and Execution:** A new run setup was created by assigning a run name and saving the configuration. Assays were loaded into designated wells, with optional assignment of sample IDs. The standard sequencing protocol was selected. The finalized setup was saved as a *.qrun* file for execution.

**Data Analysis**: Upon completion of the sequencing run, the *.qrun* file was transferred to a computer equipped with PyroMark Q48 Autoprep Software for analysis. The SNP analysis mode was selected from the toolbar to facilitate genotyping of single nucleotide polymorphisms. Resulting data were visualized in the Pyrogram, where genotype calls (e.g., homozygous or heterozygous) were determined based on peak patterns.
